# Supplementary material for: A Systematic Review of Circulating Tumor Cells Clinical Application in Prostate Cancer Diagnosis
Source: MDPI journal article supplement (doi:10.3390/cancers14153802), 2022-08-04
Supplement: s1 [file s1]

## Supplementary materials

**Table S1.** CTC in metastatic PC.

| Author, year                    | Title                                                                                                                                                                                                                                                    | Number of LE patients/samples                          | Conditions                                 | Methodology                                             | Cell count                                                                                                                                                     | Genes/receptors                                                                                                                                                                                        |
|---------------------------------|----------------------------------------------------------------------------------------------------------------------------------------------------------------------------------------------------------------------------------------------------------|--------------------------------------------------------|--------------------------------------------|---------------------------------------------------------|----------------------------------------------------------------------------------------------------------------------------------------------------------------|--------------------------------------------------------------------------------------------------------------------------------------------------------------------------------------------------------|
| T. Okegawa et al., 2016. [34]   | Epidermal Growth Factor Receptor Status in Circulating Tumor Cells as a Predictive Biomarker of Sensitivity in Castration-Resistant Prostate Cancer Patients Treated with Docetaxel Chemotherapy                                                         | 4 60 patients                                          | mCRPC at docetaxel. Mean OS 13.7 ± 9.2 mo. | CellSearch®, Tumor Phenotyping Reagent EGFR             | Baseline: median 8 cells/7.5mL (range 0-184). Significant correlation with PSA>30 ng/mL, EOD>3, ISUP 5.<br><br>For CTC<5, OS 20 mo.<br>For CTC ≥5, OS 11.5 mo. | EGFR+ CTC: median 39% (range 5 – 100%)                                                                                                                                                                 |
| D. C. Danila et al., 2016. [16] | Clinical Validity of Detecting Circulating Tumor Cells by AdnaTest Assay Compared With Direct Detection of Tumor mRNA in Stabilized Whole Blood, as a Biomarker Predicting Overall Survival for Metastatic Castration-Resistant Prostate Cancer Patients | 2b 47 patients, 55 blood samples/12 healthy volunteers | mCRPC. Median OS 13 mo (range 1 – 42)      | 1) AdnaTest<br>2) Direct detection PCR<br>3) CellSearch | 3) Unfavourable (≥5 cells/7.5 mL) in 45% (95% CI 33 – 58%). Significant disagreement 1 & 3 (p=0.027), 2 & 3 (p=0.001)                                          | 1) Specificity 100%. Positive in 62% (95%CI 48 – 75%) based on KLK3, EGFR, PSMA.<br>2) Positive in 69% (95%CI 55 – 81%) based on KLK3, KLK2, HOXB13, FOXA1.<br>No disagreement between 1 & 2 (p=0.42). |
| C. Massard                      | Phenotypic and genetic heterogeneity of tumor tissue and                                                                                                                                                                                                 | 4 55 patients                                          | mCRPC, testosterone <0.50 ng/mL, ECOG 0–2  | 1) CellSearch<br>2) ISET                                | 1) Median 72 CTC/7.5 mL (range 15 –                                                                                                                            | 1) AR-amplification in 4/6 patients.                                                                                                                                                                   |

|                                                                                           |                                                                                                                                      |    |                                                 |                                                                              |                                                  |                                                                                                                                                                                            |                                    |
|-------------------------------------------------------------------------------------------|--------------------------------------------------------------------------------------------------------------------------------------|----|-------------------------------------------------|------------------------------------------------------------------------------|--------------------------------------------------|--------------------------------------------------------------------------------------------------------------------------------------------------------------------------------------------|------------------------------------|
| et al., 2016. [31]                                                                        | circulating tumor cells in patients with metastatic castration-resistant prostate cancer: A report from the PETRUS prospective study |    |                                                 |                                                                              |                                                  | 249). Epithelial ERG-rearrangement cells CTC 88%<br>2) Median 45 concordant to tumor CTC/7.5 mL (range 4 – 218) with no epithelial or mesenchymal markers                                  |                                    |
| Heterogeneous PSMA expression on                                                          |                                                                                                                                      |    |                                                 |                                                                              |                                                  |                                                                                                                                                                                            |                                    |
| T.M. Gorges et al., 2016. [19]                                                            | circulating tumor cells - a potential basis for stratification and monitoring of PSMA-directed therapies in prostate cancer          | 2b | 29 patients                                     | Metastatic PC, different therapy                                             | 1) CellSearch, 2) IF for PSMA                    | 20 patients (69%) CTC-positive.                                                                                                                                                            | 12 patients with PSMA-positive CTC |
| Decline in Circulating Tumor Cell Count and Treatment Outcome in Advanced Prostate Cancer |                                                                                                                                      |    |                                                 |                                                                              |                                                  |                                                                                                                                                                                            |                                    |
| D. Lorente et al., 2016. [28]                                                             | Tumor Cell Count and Treatment Outcome in Advanced Prostate Cancer                                                                   | 2b | 486 patients with baseline CTC ≥5 cells/7.5 ml  | mCRPC, chemotherapy or placebo. Median follow-up 11.2 mo, median OS 11.6 mo. | CellSearch. CTC measured baseline and at therapy | Median baseline CTC 19.5 cells/7.5 ml. 30% decline associated with better OS (16.1 vs 9.7 mo; HR 0.39, 95% CI 0.3–0.5; p < 0.001). No difference between stable and progressive CTC count. | --                                 |
| N. J. Vogelzang et al., 2017. [46]                                                        | Circulating Tumor Cells in a Phase 3 Study of Docetaxel and Prednisone with or without                                               | 4  | 208 patients with available baseline CTC counts | mCRPC, docetaxel + 1)lenalidomide or 2)placebo                               | CellSearch.                                      | Baseline CTC ≥5 cells/7.5 ml is prognostic for OS                                                                                                                                          | --                                 |

|                                |                                                                                                                                                      |    |                                                           |                                                          |                                                                  |                                                                                                                                                                                                                                                                                                                                                                                         |
|--------------------------------|------------------------------------------------------------------------------------------------------------------------------------------------------|----|-----------------------------------------------------------|----------------------------------------------------------|------------------------------------------------------------------|-----------------------------------------------------------------------------------------------------------------------------------------------------------------------------------------------------------------------------------------------------------------------------------------------------------------------------------------------------------------------------------------|
|                                | Lenalidomide in Metastatic Castration-resistant Prostate Cancer                                                                                      |    |                                                           |                                                          | (HR 3.23, p = 0.0028).                                           | Mean response<br>1) -69.7 cells/7.5 l,<br>2) -34.1 cells/7.5 ml                                                                                                                                                                                                                                                                                                                         |
| H. Beltran et al., 2016. [14]  | The Initial Detection and Partial Characterization of Circulating Tumor Cells in Neuroendocrine Prostate Cancer                                      | 1b | 27 patients to develop classification, 159 for validation | Pure or mixed neuroendocrine metastatic PC (NEPC), mCRPC | 1) CellSearch and Epic<br>2) IF for CK, CD45, AR, and DAPI       | In NEPC+ median CTC 64.4, in NEPC- median CTC 4.2, p<0.01.<br><br>Patients with visceral mts: 35% CTC NEPC+, 15% NEPC-, p=0.04                                                                                                                                                                                                                                                          |
| H. I. Scher et al., 2016. [40] | Association of AR-V7 on Circulating Tumor Cells as a Treatment-Specific Biomarker With Outcomes and Survival in Castration-Resistant Prostate Cancer | 2b | 161 patients, 193 blood samples                           | Progressive mCRPC undergoing a change in treatment       | IF for DNA, CK, CD45, and AR-V7                                  | 0 samples with PSA response AR-V7+. 20% samples with resistant PC AR-V7+.<br><br>AR-V7+ median count 2.4/mL (range 0.74 – 105 cells/mL). 1st line therapy: AR-V7+ at 3% samples, 2nd – at 18%, 3rd – at 31%.<br><br>Worse outcomes for AR-V7+ at ARSI (median PFS 2.3 vs 14.5 mo, p < 0.001; median OS 4.6 mo vs not reached, p < 0.001)<br><br>Similar outcomes for AR-V7+ at taxanes. |
| H. I. Scher et al., 2017. [39] | Phenotypic Heterogeneity of Circulating Tumor Cells Informs Clinical Decisions between AR Signaling                                                  | 2b | 179 patients, 319 blood samples                           | Progressive mCRPC undergoing a change in treatment       | IF for DNA, CK, CD45, and AR-V7. SeqPlex (Sigma) for single-cell | --<br><br>Median OS for "high" and "low" Shannon index: - at ARSI 8.8 mo vs. 28.1 mo, p = 0.0015).                                                                                                                                                                                                                                                                                      |

| Inhibitors and Taxanes in Metastatic Prostate Cancer |                                                                                                                                 |    |                                     | whole genome amplification (WGA)                           | - at taxanes, 11.4 mo vs. 12.9 mo, p = 1.                                                                                                                                                                                                                                                                                |
|------------------------------------------------------|---------------------------------------------------------------------------------------------------------------------------------|----|-------------------------------------|------------------------------------------------------------|--------------------------------------------------------------------------------------------------------------------------------------------------------------------------------------------------------------------------------------------------------------------------------------------------------------------------|
| L. León-Mateos et al., 2017. [26]                    | Improving circulating tumor cells enumeration and characterization to predict outcome in first line chemotherapy mCRPC patients | 2b | 29 patients, 19 healthy individuals | mCRPC eligible for Docetaxel / Cabazitaxel                 | CTC detected in 93.1% patients, ≥ 5 CTC/mL in 65.5% patients (100% with biochemical and 75% with radiological progression). Positive correlation with T3, N+.                                                                                                                                                            |
| A. Josefsson et al., 2017. [23]                      | Circulating Tumor Cells as a Marker for Progression-Free Survival in Metastatic Castration-Naïve Prostate Cancer                | 2b | 53 patients                         | Castration - naïve with PSA >80 ng/ml and/or metastatic PC | 1) AdnaTest Prostate Cancer Select/Detect + PCR for PSA, PSMA, EGFR, and actin<br>2) CellSearch, enrichment with EpCAM-antibody. IF for CD45 and CK<br>1) CTC detected in 95% (100% with mts),<br>2) CTC detected in 80%<br>1) CTC detection predicted mts with a sensitivity 98%, specificity 75%, PPV 96%, and NPV 86% |
| S. K. Pal et al., 2018. [36]                         | Synaptophysin expression on circulating tumor cells in patients with castration resistant                                       | 4  | 44 patients                         | mCRPC                                                      | CTC count significantly higher in Abiraterone or Enzalutamide<br>SYP-positive CTC percentage higher in resistant, than in response group.                                                                                                                                                                                |

| prostate cancer<br>undergoing treatment<br>with abiraterone<br>acetate or<br>enzalutamide |                                                                                                                                                                                                                                   |                                                                                           |                                                                                 | resistant, than<br>in response<br>group.                           |                                                                                                                    |                                                                                                                                        |
|-------------------------------------------------------------------------------------------|-----------------------------------------------------------------------------------------------------------------------------------------------------------------------------------------------------------------------------------|-------------------------------------------------------------------------------------------|---------------------------------------------------------------------------------|--------------------------------------------------------------------|--------------------------------------------------------------------------------------------------------------------|----------------------------------------------------------------------------------------------------------------------------------------|
| L. Xu et al., 2017. [48]                                                                  | The novel association of circulating tumor cells and circulating megakaryocytes with prostate cancer prognosis                                                                                                                    | 81 patients, 2b 24 healthy male donors                                                    | 1) 38 with untreated localized PC,<br>2) 43 with progressive CRPC (40 with mts) | 1) Parsortix <sup>TM</sup> (isolation)<br>2) IF for CK, VIM, CD45. | --                                                                                                                 | 1) CK+/VIM- 47%,<br>CK+/VIM+ 18%,<br>CK-/VIM+ 55%<br>2) CK+/VIM- 72%,<br>CK+/VIM+ 70%,<br>CK-/VIM+ 88%.<br>No association with OS      |
| E. S. Antonarakis et al., 2017. [8]                                                       | Clinical Significance of Androgen Receptor Splice Variant-7 RNA Detection in Circulating Tumor Cells of Men With Metastatic Castration-Resistant Prostate Cancer Treated With First- and Second-Line Abiraterone and Enzalutamide | 202 patients (95 abiraterone, 107 enzalutamide)                                           | mCRPC starting treatment with enzalutamide or abiraterone                       | AdnaTest, EpCAM –based CTC capture. Detection of AR-V7             | 73.8% patients CTC+.<br>Response in 75.5% CTC-.                                                                    | 17.8% patients CTC+/AR-V7+.<br>Response in 52.2% CTC+/AR-V7-,<br>13.9% CTC+/ARV7+.<br>AR-V7 is an independent predictor of PFS and OS. |
| M. K. Thakur et al., 2018. [44]                                                           | Phase I Trial of the Combination of Docetaxel, Prednisone, and Pasireotide in Metastatic Castrate-Resistant Prostate Cancer                                                                                                       | 18 patients (7 previously underwent radical prostatectomy, 8 had neuroendocrine features) | mCRPC, combination of docetaxel, prednisone, and pasireotide                    | --                                                                 | Baseline <5 CTC/ 7.5mL – 6 patients, median OS 26.6 mo.<br>Baseline ≥5 CTC/ 7.5mL – 9 patients, median OS 14.6 mo. | --                                                                                                                                     |
| P. C. Barata et al.                                                                       | Phase I/II study evaluating the safety and clinical efficacy of                                                                                                                                                                   | 2b 21 patients total, 11 had CTC                                                          | mCRPC progressed after 1 or 2 prior chemotherapy regimens                       | CellSearch                                                         | Baseline median 80 CTC (range 17–397),                                                                             | --                                                                                                                                     |

|                               |                                                                                                                                                                |                     |                                  |                                                                   |                                |                                                                                                                                                                                               |
|-------------------------------|----------------------------------------------------------------------------------------------------------------------------------------------------------------|---------------------|----------------------------------|-------------------------------------------------------------------|--------------------------------|-----------------------------------------------------------------------------------------------------------------------------------------------------------------------------------------------|
| al., 2019. [12]               | temsirolimus and bevacizumab in patients with chemotherapy refractory metastatic castration-resistant prostate cancer                                          | assessment baseline | (docetaxel or mitoxantrone)      |                                                                   |                                | no association with Gleason score and PSA.<br><br>Median relative decrease 82% (range 62–100%) at 3 cycle. No correlation with PSA change.                                                    |
| D. Lorente et al., 2018. [27] | Circulating Tumor Cell Increase as a Biomarker of Disease Progression in Metastatic Castration-Resistant Prostate Cancer Patients with Low Baseline CTC Counts | 4                   | 511 patients                     | mCRPC at chemotherapy or abiraterone, CTC counts < 5 cells/7.5 mL | CellSearch                     | OS associated with CTC count, HR 1.65; 95% CI 1.32 – 2.05; p<0.001.<br><br>Worse OS for CTC progression in 4 weeks, 8 weeks, and 12 weeks (27.1 vs 13.6 mo; HR 3.9 [95%CI: 2.9-5.2]; p<0.001) |
| S. Tommasi et al., 2019. [45] | Standardization of CTC AR-V7 PCR assay and evaluation of its role in castration resistant prostate cancer progression                                          | 1b                  | 44 patients in validation cohort | mCRPC, abiraterone / enzalutamide or chemotherapy                 | AdnaTest, PCR for PSA and PSMA | --<br><br>75% AR-V7+ patients resistant for abiraterone / enzalutamide, 57% AR-V7– patients hormone sensitive. Median PFS 6 mo for AR-V7+ and 18 mo for AR-V7–                                |

|                                  |                                                                                                                                                                       |    |                                                     |                                                                 |                                                             |                                                                                                                     |                                                                                                                                                                                                                                                                                                                        |
|----------------------------------|-----------------------------------------------------------------------------------------------------------------------------------------------------------------------|----|-----------------------------------------------------|-----------------------------------------------------------------|-------------------------------------------------------------|---------------------------------------------------------------------------------------------------------------------|------------------------------------------------------------------------------------------------------------------------------------------------------------------------------------------------------------------------------------------------------------------------------------------------------------------------|
| T. Okegawa et al., 2018. [35]    | AR-V7 in circulating tumor cells cluster as a predictive biomarker of abiraterone acetate and enzalutamide treatment in castration-resistant prostate cancer patients | 2b | 98 patients (64 at abiraterone, 34 at enzalutamide) | mCRPC, abiraterone / enzalutamide + zoledronic acid             | 1) on-chip multi-imaging flow cytometry<br>2) PCR for AR-V7 | CTC- patients: PSA response in 79.6%, median PFS not reached, median OS 35 mo                                       | CTC+/ AR-V7-: PSA response in 43.5%, median PFS 17 mo, median OS 24 mo.<br><br>CTC+/ AR-V7+: PSA response in 15.4%, median PFS 13 mo, median OS 13.5 mo.                                                                                                                                                               |
| D.T. Miyamoto et al., 2018. [32] | An RNA-Based Digital Circulating Tumor Cell Signature Is Predictive of Drug Response and Early Dissemination in Prostate Cancer                                       | 4  | 27 patients                                         | mCRPC, initiating abiraterone therapy in the first-line setting | 1) Digital CTCM score<br>2) CTC-iChip                       | Elevated CTCM score predicts worse OS (HR = 6.0; P = 0.01) and rapid radiographic progression (HR = 3.2; P = 0.046) | Expression of the genes predicts lower OS: HOXB13 (HR = 11.8; p = 0.004), FOLH1 (HR = 6.3; p = 0.01), KLK2 (HR = 6.0; p = 0.01), KLK3 (HR = 8.3; p = 0.02), AGR2 (HR = 5.6; p = 0.01);<br><br>ARV7 >14.7 transcripts/mL in CTCs predicts shorter OS (HR = 28.8; P < 0.001) and radiographic PFS (HR = 10.4; p = 0.004) |
| H.I. Scher et al., 2018. [38]    | Assessment of the Validity of Nuclear-Localized Androgen Receptor Splice Variant 7 in Circulating Tumor Cells as a Predictive                                         | 2b | 142 patients (70 ARSI; 72 taxanes)                  | mCRPC before starting ARS inhibitors or taxanes                 | IHC for DNA, CK, CD45, AR-V7                                | --                                                                                                                  | Median OS AR-V7-: 19.8 mo for ARSI vs 12.8 mo for taxane (HR, 1.67; 95% CI, 1.00-2.81; p = 0.05)<br>Median OS AR-V7+: 14.3 mo taxanes vs                                                                                                                                                                               |

|                                           |                                                                                                                                                                                                                                    |    |                                                                                           |                                                                                                                                                    |                                                                       |                                                                                                                                                                                                                                           |    |
|-------------------------------------------|------------------------------------------------------------------------------------------------------------------------------------------------------------------------------------------------------------------------------------|----|-------------------------------------------------------------------------------------------|----------------------------------------------------------------------------------------------------------------------------------------------------|-----------------------------------------------------------------------|-------------------------------------------------------------------------------------------------------------------------------------------------------------------------------------------------------------------------------------------|----|
|                                           | Biomarker for<br>Castration-Resistant<br>Prostate Cancer                                                                                                                                                                           |    |                                                                                           |                                                                                                                                                    |                                                                       | 7.3 mo ARSI (HR<br>0.62; 95% CI, 0.28-<br>1.39; p = 0.25)                                                                                                                                                                                 |    |
| K.A.<br>Autio et<br>al., 2018.<br>[11]    | Safety and Efficacy of<br>BIND-014, a<br>Docetaxel<br>Nanoparticle<br>Targeting Prostate-<br>Specific Membrane<br>Antigen for Patients<br>With Metastatic<br>Castration-Resistant<br>Prostate Cancer: A<br>Phase 2 Clinical Trial. | 4  | 42<br>chemotherapy-<br>naïve patients<br>with<br>progressing<br>mCRPC after 2-<br>line HT | mCRPC, 20 - previous<br>treatment with<br>abiraterone acetate, 5 -<br>enzalutamide, 6 both<br>abiraterone and<br>enzalutamide, and 12 -<br>Ra 223. | Epic Sciences<br>non-EPCAM-<br>based CTC<br>detection<br>platform     | 89% patients<br>CTC+<br><br>OS 9.5 mo for<br>CTC count<br>above median<br>vs 28.2 mo for<br>CTC count<br>below median<br>CTC, p < 0.001.                                                                                                  | -- |
| B. De<br>Laere et<br>al., 2018.<br>[18]   | Circulating tumor<br>cells and survival in<br>abiraterone- and<br>enzalutamide-treated<br>patients with<br>castration-resistant<br>prostate cancer.                                                                                | 2b | 102 patients                                                                              | mCRPC, abiraterone /<br>enzalutamide. Follow-up<br>10-12 weeks                                                                                     | 1)CellSave<br>2) CellPrep<br>system,<br>3)CellTracks<br>4)Analyzer II | For CTC<br>increase vs<br>decreasing or<br>stable CTC<br>count shorter:<br>- PFS, 4.03 vs<br>12.98 vs 13.67<br>mo, HR 3.6,<br>95%CI 1.9-6.8;<br>p < 0.0001)<br>-OS, 11.2 mo vs<br>not reached,<br>HR 9.5, 95%CI<br>3.7-24; p <<br>0.0001) | -- |
| A. J.<br>Armstrong<br>et al,<br>2019. [9] | Prospective<br>Multicenter<br>Validation of<br>Androgen Receptor<br>Splice Variant 7 and<br>Hormone Therapy<br>Resistance in High-<br>Risk Castration-<br>Resistant Prostate                                                       | 1b | 118 patients                                                                              | MCRPC, abiraterone /<br>enzalutamide / both                                                                                                        | 1) CellSearch<br>2)AdnaTest<br>mRNA                                   | Median OS for AR-<br>V7+ vs AR-V7- : 10.8<br>vs 27.2 mo (HR, 3.9;<br>95% CI, 2.2 to 6.9).                                                                                                                                                 | -- |



|                                       |                                                                                                                                                                                     |    |                                                        |                                                |                                                                                                            |                                                                                                                                  |                                                                                                                                                                                                                                                     |
|---------------------------------------|-------------------------------------------------------------------------------------------------------------------------------------------------------------------------------------|----|--------------------------------------------------------|------------------------------------------------|------------------------------------------------------------------------------------------------------------|----------------------------------------------------------------------------------------------------------------------------------|-----------------------------------------------------------------------------------------------------------------------------------------------------------------------------------------------------------------------------------------------------|
| Cancer: The PROPHECY Study.           |                                                                                                                                                                                     |    |                                                        |                                                |                                                                                                            |                                                                                                                                  |                                                                                                                                                                                                                                                     |
| B. P. S. Belderbos et al., 2019. [13] | Associations between AR-V7 status in circulating tumour cells, circulating tumour cell count and survival in men with metastatic castration-resistant prostate cancer.              | 2b | 94 patients                                            | mCRPC, patients after docetaxel or cabazitaxel | CellSearch                                                                                                 | Median OS for $\geq 5$ CTCs: 6.9 mo (IQR: 4.3-13.8) vs 22.3 mo, IQR: 19.2-34.6).                                                 | No difference in survival between AR-V7+ and AR-V7- patients (HR of 1.1, 95% CI: 0.6-1.9, p= 0.78).                                                                                                                                                 |
| P. Sepe et al., 2019. [41]            | Could Circulating Tumor Cells and ARV7 Detection Improve Clinical Decisions in Metastatic Castration-Resistant Prostate Cancer? The Istituto Nazionale dei Tumori (INT) Experience. | 4  | 37 patients                                            | mCRPC, enzalutamide/abirateron                 | 1)Enrichment – AdnaTest.<br>2)Semiquantitative multiplex PCR using the PrimerMix provided in the AdnaTest. | Radiological response: 66% for CTC-, 25% for CTC+.<br>OS 14.6 mo for CTC+ vs >24 mo for CTC-.<br>HR for relapse 3.85 fold higher | Radiological response similar for ARV7- and ARV7+.<br>AR+ HR for recurrence 3-4-fold higher, for death 11-fold higher                                                                                                                               |
| S.T. Tagawa et al., 2019. [43]        | Expression of AR-V7 and ARv567es in Circulating Tumor Cells Correlates with Outcomes to Taxane Therapy in Men with Metastatic Prostate Cancer Treated in TAXYNERGY.                 | 4  | 54 chemotherapy-naïve patients with progressive mCRPC. | mCRPC, docetaxel/cabazetaxel                   | ddPCR(digital PCR)                                                                                         | --                                                                                                                               | Median PFS 16.6 mo for double-negative patients, 11.2 mo for ARV7-/ARv567es+ (p=0.18), and 8.5 mo for ARV7+ (p=0.004).<br>Median PFS ARV7 vs ARV7+ : 12.0 vs 8.5 mo (HR=0.38, P=0.01).<br>For the ARv567es- vs ARv567es+, median PFS 12.7 vs 7.3 mo |

|                                    |                                                                                                                                               |   |                                                   |                                                                                                                                                                                          |                                                       |                                                                                                                                                                                                                                                                                                                                                                            |
|------------------------------------|-----------------------------------------------------------------------------------------------------------------------------------------------|---|---------------------------------------------------|------------------------------------------------------------------------------------------------------------------------------------------------------------------------------------------|-------------------------------------------------------|----------------------------------------------------------------------------------------------------------------------------------------------------------------------------------------------------------------------------------------------------------------------------------------------------------------------------------------------------------------------------|
| (HR=0.37, p=0.02).                 |                                                                                                                                               |   |                                                   |                                                                                                                                                                                          |                                                       |                                                                                                                                                                                                                                                                                                                                                                            |
| I.E. de Kruijff et al., 2019. [17] | Circulating Tumor Cell Enumeration and Characterization in Metastatic Castration-Resistant Prostate Cancer Patients Treated with Cabazitaxel. | 4 | 114 patients                                      | mCRPC previously treated with docetaxel. 36% of the patients had received anti-AR treatment (mainly abiraterone 23/43, 53%) for mCRPC before enrollment. 6 weeks of cabazitaxel therapy. | 1)CellSave, 2)CellSearch, 3)AllPrep DNA/RNA Micro Kit | Median PFS: group 1 (<5 CTCs at baseline and follow-up (n = 24)): 8.7 mo; group 2 (≥5 CTCs at baseline, <5 CTCs at therapy (n = 19)): 6.4 mo; group 3 (<5 CTCs at baseline, ≥5 CTCs at therapy (n = 5)): 7.4 mo; group 4 (≥ 5 CTCs both at baseline and during therapy (n = 47)): 3.5 mo. Median OS group 1: 19.0 mo; group 2: 12.8 mo; group 3: 23.0 mo; group 4: 6.9 mo. |
| P. C. Mandel et al., 2021. [29]    | Enumeration and Changes in Circulating Tumor Cells and Their Prognostic Value in Patients Undergoing                                          | 4 | 33 patients with hormone-naïve oligometastatic PC | mCRPC, cytoreductive RP                                                                                                                                                                  | CellSearch                                            | CTC-/CTC+ before and after RP was not statistically different (p = 0.285).                                                                                                                                                                                                                                                                                                 |

|                                |                                                                                                                                                                       |    |              |                                 |                                                                             |                                                                                                                 |                                                                                                                                                                                                                 |
|--------------------------------|-----------------------------------------------------------------------------------------------------------------------------------------------------------------------|----|--------------|---------------------------------|-----------------------------------------------------------------------------|-----------------------------------------------------------------------------------------------------------------|-----------------------------------------------------------------------------------------------------------------------------------------------------------------------------------------------------------------|
|                                | Cytoreductive Radical Prostatectomy for Oligometastatic Prostate Cancer-Translational Research Results from the Prospective ProMPT trial.                             |    |              |                                 |                                                                             |                                                                                                                 | ≥2 CTC associated with worse OS and progression to mCRPC                                                                                                                                                        |
| A. Sharp et al., 2019. [42]    | Clinical Utility of Circulating Tumour Cell Androgen Receptor Splice Variant-7 Status in Metastatic Castration-resistant Prostate Cancer.                             | 2b | 136 patients | mCRPC                           | 1)CellSearch<br>2)AdnaTest                                                  | OS in CTC+/AR-V7+ patients compared with CTC- patients (HR 2.13; 95% CI 1.23–3.71; p = 0.02)                    | OS in CTC+/AR-V7- patients (HR 1.26; 95% CI 0.73-2.17; p=0.4).                                                                                                                                                  |
| R.P. Graf et al., 2020. [20]   | Clinical Utility of the Nuclear-localized AR-V7 Biomarker in Circulating Tumor Cells in Improving Physician Treatment Choice in Castration-resistant Prostate Cancer. | 2b | 193 patients | mCRPC, ARSI/taxanes             | Automated immunofluorescent staining for DNA, cytokeratins, CD45, and AR-V7 | --                                                                                                              | Superior OS for AR-V7+ on a taxane vs ARSI (median 9.8 vs 5.7 mo; HR 1.8; p = 0.041)                                                                                                                            |
| J. S. Chung et al., 2019. [15] | Circulating Tumor Cell-Based Molecular Classifier for Predicting Resistance to Abiraterone and Enzalutamide in Metastatic Castration-Resistant Prostate Cancer.       | 4  | 37 patients  | mCRPC, abiraterone/enzalutamide | 1)Anti-EpCAM antibody–conjugated microbeads<br>2)Multiplex qPCR             | In CTC+ median 91 days (IQR: 55-228) to PSA progression and 142 days (IQR: 42-492) to radioclinical progression | the AUCs for the multigene model (AR, AR-V7, PSA, PSCA, TSPAN8, WNT5B, NKX3-1, and SPINK1) showed increased accuracy compared to AR-V7 alone for PSA PFS (0.84 vs. 0.65) and radioclinical PFS (0.86 vs. 0.64). |

|                                   |                                                                                                                                       |    |              |                                                                                       |                                                                                                                |    |                                                                                                                                                                                                                                                                                                                |
|-----------------------------------|---------------------------------------------------------------------------------------------------------------------------------------|----|--------------|---------------------------------------------------------------------------------------|----------------------------------------------------------------------------------------------------------------|----|----------------------------------------------------------------------------------------------------------------------------------------------------------------------------------------------------------------------------------------------------------------------------------------------------------------|
| M. Kozminsky et al., 2019. [24]   | Detection of CTC Clusters and a Dedifferentiated RNA-Expression Survival Signature in Prostate Cancer.                                | 4  | 41 patients  | mCRPC                                                                                 | RT-qPCR                                                                                                        | -- | For OS, the three-gene combination (CDH1, CD11B, and STAT3) showed the best performance (HR: 0.78, 95% CI: 0.62–0.99; HR: 2.04, 95% CI: 1.32–3.14; and HR: 0.46, 95% CI: 0.30–0.72, respectively).                                                                                                             |
| A. Josefsson et al., 2019. [22]   | AR-V7 expression in circulating tumor cells as a potential prognostic marker in metastatic hormone-sensitive prostate cancer.         | 4  | 36 patients  | mCRPC                                                                                 | qRT-PCR                                                                                                        | -- | Median time to CRPC for AR-V7+ 4.9 mo (95% CI: 3.95–9), for AR-V7- 8.9 mo (95% CI: 5.9–12.3) (p = 0.02). CSS for AR-V7+ 14.3 mo (95% CI: 7.8–20.7), for AR-V7- 33.0 mo (95% CI: 18.3–47.7) (p = 0.002). AR+ (p = 0.02, HR: 2.5, 95% CI: 1.2–5.3) and ARV7+ (p = 0.02, HR: 2.7, 95%CI: 1.2–6.5) are prognostic. |
| A.J. Armstrong et al., 2020. [10] | Prospective Multicenter Study of Circulating Tumor Cell AR-V7 and Taxane Versus Hormonal Treatment Outcomes in Metastatic Castration- | 2b | 118 patients | mCRPC, abiraterone or enzalutamide, 51 - subsequent docetaxel (42) or cabazitaxel (9) | 1) Johns Hopkins modified AdnaTest CTC AR-V7 messenger RNA assay<br>2) the Epic Sciences CTC nuclear-localized | -- | Abiraterone or Enzalutamide: AR-V7 + Median OS 11.1/8.4; Median PFS 3.7/3.7; AR-V7 – Median OS 24.8/20.5; Median PFS 7.2/6.0;                                                                                                                                                                                  |

| Resistant Prostate Cancer         |                                                                                                                                   |   |             | AR-V7 protein assay                                                                                                   |                                                                                                      | Taxane Chemotherapy:<br>AR-V7 +<br>Median OS 8.2/6.8;<br>Median PFS 4.0/4.5;<br>AR-V7 –<br>Median OS 12.6/11.1;<br>Median PFS 6.1/5.3. |                                                                                                                                                                                                                                                           |
|-----------------------------------|-----------------------------------------------------------------------------------------------------------------------------------|---|-------------|-----------------------------------------------------------------------------------------------------------------------|------------------------------------------------------------------------------------------------------|----------------------------------------------------------------------------------------------------------------------------------------|-----------------------------------------------------------------------------------------------------------------------------------------------------------------------------------------------------------------------------------------------------------|
| L. Hofmann et al., 2020. [21]     | A Multi-Analyte Approach for Improved Sensitivity of Liquid Biopsies in Prostate Cancer                                           | 4 | 19 patients | Progressive-advanced or metastatic CRPC, before and after analysis: abiraterone, enzalutamide, taxane or combinations | 1) the CellCollector<br>2) RT-qPCR-based<br>3) shallow whole-genome sequencing (sWGS) of plasma DNA. | No correlation between CTC and PSA or OS                                                                                               | None of the identified biomarkers was significantly associated with OS.                                                                                                                                                                                   |
| L. León-Mateos et al., 2020. [25] | Global Gene Expression<br>Characterization of Circulating Tumor Cells in Metastatic Castration-Resistant Prostate Cancer Patients | 4 | 28 patients | mCRPC; docetaxel                                                                                                      | 1) CELlectionTM Epithelial Enrich system<br>2) CellSearch system<br>3) qRT-PCR                       | --                                                                                                                                     | Longer PFS at low expression of MAOA (8.73 mo vs 6.47 mo; p=0.028), MOSPD1 (8.74 mo vs 5.39 mo; p=0.028), QKI (8.78 mo vs 5.74 mo; p=0.022), SDK1 (8.89 mo vs 4.7 mo; p=0.014). Shorter OS for high expression of HOXB13 (16.39 mo vs 31.77 mo; p=0.0014) |
| M. Marín-Aguilera                 | Androgen Receptor and Its Splicing Variant 7 Expression in Peripheral Blood                                                       | 4 | 81 patients | mCRPC, 71 docetaxel/10 cabazitaxel (11both)                                                                           | 1) IsoFlux System<br>2) qRT-PCR                                                                      | --                                                                                                                                     | High ARV7 correlated with better PSA-PFS (HR 0.45, 95% CI 0.3 –                                                                                                                                                                                           |

|                                       |                                                                                                                                                                 |   |             |                                                                        |            |    |                                                                                                                                 |                                                                                                                                                                                                                                                                                    |
|---------------------------------------|-----------------------------------------------------------------------------------------------------------------------------------------------------------------|---|-------------|------------------------------------------------------------------------|------------|----|---------------------------------------------------------------------------------------------------------------------------------|------------------------------------------------------------------------------------------------------------------------------------------------------------------------------------------------------------------------------------------------------------------------------------|
| et al.,<br>2020. [30]                 | Mononuclear Cells<br>and in Circulating<br>Tumor Cells in<br>Metastatic Castration-<br>Resistant Prostate<br>Cancer                                             |   |             |                                                                        |            |    |                                                                                                                                 | 0.7, $p = 0.002$ ), RX-<br>PFS (HR 0.56, 95%<br>CI 0.3–0.9, $p = 0.02$ )<br>and OS (HR 0.54,<br>95% CI 0.3–0.9, $p =$<br>0.013).<br>High ARV7<br>expression<br>correlated with<br>worse PFS ( $p =$<br>0.002)<br>High ARFL<br>correlated with<br>worse OS ( $p =$<br>0.012).       |
| N.<br>Nagaya<br>et al.,<br>2020. [33] | Prostate-specific<br>membrane antigen in<br>circulating tumor cells<br>is a new poor<br>prognostic marker for<br>castration-resistant<br>prostate cancer.       | 4 | 56 patients | mCRPC                                                                  | AdnaTest   | -- |                                                                                                                                 | For PSMA+<br>Median PSA-PFS<br>shorter (12 weeks vs<br>30 weeks, $p = 0.008$ ).<br>Median OS shorter<br>(13 mo vs 27 mo, $p =$<br>0.01).<br>Shorter PSA-PFS<br>(HR 4.02; 95% CI,<br>1.33 to 12.8; $p =$<br>0.014)<br>Shorter OS (HR<br>7.62; 95% CI, 1.08 to<br>153; $p = 0.04$ ). |
| C. Wang<br>et al.,<br>2021. [47]      | Improved Prognostic<br>Stratification Using<br>Circulating Tumor<br>Cell Clusters in<br>Patients with<br>Metastatic Castration-<br>Resistant Prostate<br>Cancer | 4 | 64 patients | mCRPC, androgen<br>receptor signaling<br>inhibitors or<br>chemotherapy | CellSearch |    | For $\geq 5$<br>CTC/7.5 mL:<br>Lower PFS (HR<br>4.03, 95% CI<br>2.09 – 7.77, $p <$<br>0.0001),<br>Lower OS (HR<br>32.84, 95% CI | --                                                                                                                                                                                                                                                                                 |

|                                     |                                                                                                                                                                        |    |             |                                                                   |                                                                                                               |                                                                                                                                                                                            |                                                                                                                                                                                                                                             |  |
|-------------------------------------|------------------------------------------------------------------------------------------------------------------------------------------------------------------------|----|-------------|-------------------------------------------------------------------|---------------------------------------------------------------------------------------------------------------|--------------------------------------------------------------------------------------------------------------------------------------------------------------------------------------------|---------------------------------------------------------------------------------------------------------------------------------------------------------------------------------------------------------------------------------------------|--|
|                                     |                                                                                                                                                                        |    |             |                                                                   |                                                                                                               |                                                                                                                                                                                            | 8.42–128.2, $p < 0.0001$ ).<br>Higher risk for death (HR 6.9, 95% CI 2.72–17.47).                                                                                                                                                           |  |
| T. Pereira-Veiga et al., 2021. [37] | Longitudinal CTCs gene expression analysis on metastatic castration-resistant prostate cancer patients treated with docetaxel reveals new potential prognosis markers. | 4  | 20 patients | mCRPC, docetaxel                                                  | CellSearch, AllPrep DNA/RNA Mini Kit - Extraction of RNA, TaqMan Gene Expression Master Mix – cDNA expression | Patients with $\geq 5$ CTCs tended to a shorter OS and PFS.                                                                                                                                | Worse PFS for high expression of KRT19 (139 vs 180 days, $p=0.03$ ), ZEB1 (119 vs 190 days, $p=0.03$ ), CDK4.<br>Lower OS for ZEB1 ( $p=0.04$ , 260 vs 426 days), KRT19 or KLK3 (74 vs 391 days, $p=0.008$ and 183 vs 720 days, $p=0.02$ ). |  |
| W. Chong et al., 2021. [49]         | Integration of circulating tumor cell and neutrophil-lymphocyte ratio to identify high-risk metastatic castration-resistant prostate cancer patients                   | 4  | 63 patients | mCRPC                                                             | CellSearch. IHS for DAPI, CD45, CK-8, 18, 19.                                                                 | CTC+ (58.7% patients) had lower PFS (5 mo vs. 18.1 mo., $p < 0.001$ )<br>4.02-fold risk of progression (HR 4.02, 95% CI 2.05 to 7.86)<br>lower OS (14.2 mo. vs. not reached, $p = 0.006$ ) | --                                                                                                                                                                                                                                          |  |
| G. Francolini et al., 2021 [51]     | Prospective assessment of AR splice variant and PSMA detection on circulating tumor cells                                                                              | 2b | 28 patients | mCRPC on standard treatment (ARTA + ADT) after I line ADT failure | AdnaTest AR-V7                                                                                                | Median time to castrate resistance shortened for CTC+, 32.3 vs                                                                                                                             | Time for castrate resistance: No difference for AR-V7+ and PSMA+ CTC                                                                                                                                                                        |  |

|                                          |                                                                                                                                                                                                                            |    |                                  |                                          |                                                                                                     |                                                                                                                                                   |                                                                                                                                                                                                                                             |
|------------------------------------------|----------------------------------------------------------------------------------------------------------------------------------------------------------------------------------------------------------------------------|----|----------------------------------|------------------------------------------|-----------------------------------------------------------------------------------------------------|---------------------------------------------------------------------------------------------------------------------------------------------------|---------------------------------------------------------------------------------------------------------------------------------------------------------------------------------------------------------------------------------------------|
|                                          | of mCRPC patients:<br>preliminary analysis<br>of patients enrolled in<br>PRIMERA trial<br>(NCT04188275)                                                                                                                    |    |                                  |                                          |                                                                                                     | 75 mo., p =<br>0.03).                                                                                                                             | Shorter for ARFL+,<br>30.2 vs 51.1 mo., p =<br>0.02.                                                                                                                                                                                        |
| B. Hayes<br>et al.,<br>2021 [50]         | Circulating Tumour<br>Cell Numbers<br>Correlate with<br>Platelet Count and<br>Circulating<br>Lymphocyte Subsets<br>in Men with<br>Advanced Prostate<br>Cancer: Data from the<br>ExPeCT Clinical Trial<br>(CTRIAL-IE 15-21) | 2b | 61 patients                      | mPCa with no history of<br>RP            | ScreenCell, flow<br>cytometry                                                                       | CTC number<br>correlates with<br>lymphocytes<br>count (r2 =<br>0.17) and NK<br>count (r2 = 0.5).                                                  | --                                                                                                                                                                                                                                          |
| M.<br>Ladurner<br>et al.,<br>2021 [52]   | Validation of Cell-<br>Free RNA and<br>Circulating Tumor<br>Cells for Molecular<br>Marker Analysis in<br>Metastatic Prostate<br>Cancer                                                                                     | 2b | 41 patients, 56<br>blood samples | mPCa                                     | ScreenCell or<br>Parsortix™                                                                         | CTC count<br>higher in<br>mCRPC (mean<br>CTCs 16.4 ±<br>4.9) vs mHSPC<br>(mean CTCs<br>5.7 ± 1.1).<br>No correlation<br>with PSA,<br>Gleason      | --                                                                                                                                                                                                                                          |
| G. Di<br>Lorenzo<br>et al.,<br>2021 [53] | Assessment of Total,<br>PTEN -, and AR-V7+<br>Circulating Tumor<br>Cell Count by Flow<br>Cytometry in Patients<br>with Metastatic<br>Castration-Resistant<br>Prostate Cancer<br>Receiving<br>Enzalutamide                  | 2b | 45 patients                      | mCRPC scheduled to<br>start enzalutamide | Anti-<br>Cytokeratins<br>8/18, PTEN, and<br>AR-V7<br>antibodies.<br>Western blot,<br>Flow Cytometry | 84.4% CTC+<br>For >5 CTC<br>worse rPFS<br>(HR, 2.35; 95%<br>CI, 1.14-4.84; p<br>= 0.021) and OS<br>(HR, 3.08; 95%<br>CI, 1.45-6.54; p<br>= 0.003) | 71.1% PTEN-, 51.1%<br>AR-V7 +<br>For ≥2 PTEN-<br>worse rPFS (HR,<br>3.96; 95% CI, 1.8-<br>8.72; p = 0.001) and<br>OS (HR, 2.36; 95%<br>CI, 1.12-5; p = 0.025)<br>For ≥1 AR-V7+<br>worse rPFS (HR,<br>5.05; 95% CI, 2.4-<br>10.64; P < .001) |



---

|                                    |                                                                                                                                                                    |   |             |                                                                                                      |          |                                                                                                                                                                                |
|------------------------------------|--------------------------------------------------------------------------------------------------------------------------------------------------------------------|---|-------------|------------------------------------------------------------------------------------------------------|----------|--------------------------------------------------------------------------------------------------------------------------------------------------------------------------------|
| D. Maillet<br>et al.,<br>2021 [54] | Her2 Expression in<br>Circulating Tumor<br>Cells Is Associated<br>with Poor Outcomes<br>in Patients with<br>Metastatic Castration-<br>Resistant Prostate<br>Cancer | 4 | 41 patients | mCRPC patients<br>(including 31 treated<br>with Androgen Receptor<br>Signaling Inhibitors<br>[ARSI]) | AdnaTest | 88% CTC+.                                                                                                                                                                      |
|                                    |                                                                                                                                                                    |   |             |                                                                                                      |          | For CTC+:<br>Shorter median<br>PSA-PFS, 6.2<br>mo. vs 23 mo.,<br>HR = 3; 95% CI<br>1.2–7.4; p =<br>0.016.<br>Shorter OS,<br>median<br>21.9 mo vs not<br>reached, p =<br>0.016. |
|                                    |                                                                                                                                                                    |   |             |                                                                                                      |          | 56% AR-V7+, 63%<br>Her2+.<br>For Her2+:<br>shorter median<br>PSA-PFS, 6.2 mo vs<br>13 mo., p = 0.034.<br>shorter OS, median<br>22.7 mo. vs not<br>reached, p = 0.05.           |

---

**Table S2.** CTC in non-metastatic PC.

| Author, year                   | Title                                                                                                                                                      | LE | Number of patients/samples                       | Conditions                                                  | Methodology                                        | Cell count                                                                                                                                                                                                                                                             | Genes/receptors |
|--------------------------------|------------------------------------------------------------------------------------------------------------------------------------------------------------|----|--------------------------------------------------|-------------------------------------------------------------|----------------------------------------------------|------------------------------------------------------------------------------------------------------------------------------------------------------------------------------------------------------------------------------------------------------------------------|-----------------|
| J. W. Davis et al., 2008. [55] | Circulating Tumor Cells in Peripheral Blood Samples From Patients With Increased Serum Prostate Specific Antigen: Initial Results in Early Prostate Cancer | 2b | 1) 97 patients, 2) 25 control                    | Localized PCa before RP, control - elevated PSA without PCa | CellSearch before and after surgery                | Same CTC count for group 1 and 2. CTC+ 21% and 20%, p= 0.95. No difference before and after surgery (16% vs 10%, p= 0.51)                                                                                                                                              | --              |
| C. P. Meyer et al., 2016. [57] | Limited prognostic value of preoperative circulating tumor cells for early biochemical recurrence in patients with localized prostate cancer               | 4  | 152 patients                                     | PC without HT                                               | CellSearch                                         | CTC detected in 11.2% patients. No significant correlation with PSA, stage, BCR.                                                                                                                                                                                       | --              |
| A. Kuske et al., 2016. [56]    | Improved detection of circulating tumor cells in non-metastatic high-risk prostate cancer patient                                                          | 2b | 86 patients before RP, 52 patients 3 mo after RP | High-risk PC (D'Amico criteria)                             | 1)CellSearch<br>2)CellCollector<br>3)EPISPOT assay | CTC detection:<br>1)37% (51/138, range 1–10, median 1.8);<br>2)54.9% (62/113, range 1–12, median 2.4);<br>3)58.7% (74/126, range 1–13, median 3).<br>The concordance between all three methods 37.4%, paired concordance 56–60%.<br>3) CTC correlated with PSA, stage. | --              |

|                                  |                                                                                                                                                              |    |                         |                                                                          |                                                                                  |                                                                                                                                                                       |                  |
|----------------------------------|--------------------------------------------------------------------------------------------------------------------------------------------------------------|----|-------------------------|--------------------------------------------------------------------------|----------------------------------------------------------------------------------|-----------------------------------------------------------------------------------------------------------------------------------------------------------------------|------------------|
|                                  |                                                                                                                                                              |    |                         |                                                                          |                                                                                  | No correlation for<br>1) and 2)                                                                                                                                       |                  |
| T. Todenhöfer et al., 2016. [58] | Microfluidic enrichment of circulating tumor cells in patients with clinically localized prostate cancer                                                     | 4  | 50 consecutive patients | Patients before RP                                                       | Enrichment with microfluidic ratchet device. Staining for CK, EpCAM, CD45, DAPI. | 50% CTC+. No correlation of CTC presence or concentration with PSA, stage (T or N), Gleason.                                                                          | All cells EpCAM+ |
| G. Roviello et al., 2017. [59]   | Circulating tumor cells correlate with patterns of recurrence in patients with hormone-sensitive prostate cancer                                             | 2b | 42 patients             | Advanced PC with recurrence after RP of radiotherapy                     | CellSearch                                                                       | 33.3% CTC+. Correlation with bone mts, OR = 4.0; 95% CI 1.0–15.9, p=0.05). No correlation with biochemical recurrence.                                                | --               |
| H. Tsumura et al., 2017. [60]    | Perioperative Search for Circulating Tumor Cells in Patients Undergoing Prostate Brachytherapy for Clinically Nonmetastatic Prostate Cancer                  | 4  | 59 patients             | Patients undergoing high-dose or low-dose brachytherapy, cM <sub>0</sub> | CellSearch                                                                       | Before surgery – 0. During surgery 11.8% patients CTC+ (p=0.012). No correlation with any clinicopathological and perioperative variables                             | --               |
| N. P. Murray et al., 2018. [62]  | Minimum Residual Disease in Patients Post Radical Prostatectomy for Prostate Cancer: Theoretical Considerations, Clinical Implications and Treatment Outcome | 2b | 321 patients            | 1 mo after RP.                                                           | Differential centrifugation with Histopaque. IHC for PSA                         | 39.6% patients CTC+. OS<br>1) CTC- and micro mts- 92.7% (86.3 – 96.2%)<br>2) CTC- and micro mts+ 55.8% (37.2 – 70.9%)<br>3) CTC+ and micro mts- 6.41% (1.19 – 18.21%) | --               |

|                                          |                                                                                                                                                           |    |                                          |                                           |                                                                                                                                        |                                                                                     |                                                                                                                                                                                                                                                                 |
|------------------------------------------|-----------------------------------------------------------------------------------------------------------------------------------------------------------|----|------------------------------------------|-------------------------------------------|----------------------------------------------------------------------------------------------------------------------------------------|-------------------------------------------------------------------------------------|-----------------------------------------------------------------------------------------------------------------------------------------------------------------------------------------------------------------------------------------------------------------|
|                                          |                                                                                                                                                           |    |                                          |                                           |                                                                                                                                        | 4) CTC+ and micro<br>mts+ 3.57% (3.52 –<br>3.63%)                                   |                                                                                                                                                                                                                                                                 |
| N. P.<br>Murray et<br>al., 2018.<br>[61] | 10 Year Biochemical<br>Failure Free Survival<br>of Men with CD82<br>Positive Primary<br>Circulating Prostate<br>Cells Treated by<br>Radical Prostatectomy | 4  | 285 patients                             | RP as a sole<br>treatment                 | Differential<br>centrifugation with<br>Histopaque. IHC<br>for PSA and CD82                                                             | 78.6% patients<br>CTC+.<br>36, 60 and 120 mo<br>survival for CTC-<br>98%, 96%, 90%. | 20% patients<br>CD82+.<br>36, 60 and 120 mo<br>survival for CTC+<br>CD82- 93%, 93%,<br>69%.<br>For CTC+ CD82+<br>62%, 44%, 16%                                                                                                                                  |
| S. Y. Choi et<br>al., 2019.<br>[63]      | Circulating Tumor<br>Cell Counts in Patients<br>With Localized<br>Prostate Cancer<br>Including Those<br>Under Active<br>Surveillance                      | 2b | 45 patients,<br>17 healthy<br>volunteers | RP                                        | 1) CTC isolation kit<br>and SMART<br>BIOPSY™ Cell<br>Isolator<br>2) IHS for PSMA-<br>EpCAM+ and CD45                                   | --                                                                                  | EpCAM+ CTC:<br>40% sensitivity,<br>88.2% specificity,<br>53.2% accuracy,<br>90% PPV, and<br>35.7% NPV.<br>PSMA+ CTC: 2.2%<br>sensitivity, 100%<br>specificity, 29%<br>accuracy, 100%<br>PPV, and 27.9%<br>NPV.<br>Positive<br>correlation of<br>grade and EpCAM |
| S. S. Salami<br>et al., 2019.<br>[64]    | Circulating Tumor<br>Cells as a Predictor of<br>Treatment Response in<br>Clinically Localized<br>Prostate Cancer                                          | 2b | 49 patients                              | Radiotherapy +<br>HT (42%) or RP<br>(58%) | 1) Epic Sciences<br>CTC platform.<br>2) IHS for CK,<br>CD45, AR.<br>3) Sigma SeqPlex<br>enhanced whole-<br>genome<br>amplification kit | Significantly more<br>CTC count in<br>patients with mts                             | Significantly more<br>AR+ CTC in<br>patients with mts<br>and biochemical<br>relapse                                                                                                                                                                             |
| H. Liu et<br>al., 2020.<br>[67]          | Prospective Study of<br>the Clinical Impact of<br>Epithelial and                                                                                          | 4  | 80 patients                              | Predominantly<br>low and                  | 1) CanPatrol™<br>2) RNA-in situ<br>hybridization with                                                                                  | 55% patients CTC+                                                                   | 38.8% patients<br>with epithelial<br>CTC, 12.5% with                                                                                                                                                                                                            |

|                                        |                                                                                                                                                                   |    |              |                                                                       |                                                                                           |                                                                                                                                                                                 |                                                                                                                                              |
|----------------------------------------|-------------------------------------------------------------------------------------------------------------------------------------------------------------------|----|--------------|-----------------------------------------------------------------------|-------------------------------------------------------------------------------------------|---------------------------------------------------------------------------------------------------------------------------------------------------------------------------------|----------------------------------------------------------------------------------------------------------------------------------------------|
|                                        | Mesenchymal Circulating Tumor Cells in Localized Prostate Cancer                                                                                                  |    |              | intermediate risk                                                     | epithelial markers (EpCAM, CK 8/18/19), mezenchymal markers (Vimentin, Twist), and CD45.  |                                                                                                                                                                                 | mesenchymal CTC, 47.5% bi-phenotypical CTC.<br><br>Bi-phenotypical CTC count predicted extraprostatic extension, p<0.01, OR=1.383, AUC 0.72. |
| W. A. Cie'slikowski et al., 2020. [65] | Circulating Tumor Cells as a Marker of Disseminated Disease in Patients with Newly Diagnosed High-Risk Prostate Cancer                                            | 2c | 104 patients | High-risk PC (D'Amico criteria), primary RP or radiotherapy.          | 1) CellSearch<br>2) Dual fluoro-EPISPOT <sup>PSA/FGF2</sup><br>3) CellCollector® CANCER01 | CTC detection rate:<br>1) 23.9%,<br>2) 52%,<br>3) 57.7%<br>≥4 CTC predicts mts                                                                                                  | --                                                                                                                                           |
| A. Zapatero et al., 2020. [66]         | Detection and dynamics of circulating tumor cells in patients with high-risk prostate cancer treated with radiotherapy and hormones: a prospective phase II study | 4  | 65 patients  | Treatment-naïve patients without mts, scheduled for radiotherapy + HT | CellSearch                                                                                | Median CTC count 1 (1–136) cell/7.5 mL.<br><br>CTC detected in 7.5% patients. After HT – 4.6%. After radiotherapy – 0%.<br><br>No association of CTC with OS or other features. | --                                                                                                                                           |
| S. Knipper et al., 2021 [68]           | Possible Role of Circulating Tumour Cells for Prediction of Salvage Lymph Node Dissection Outcome in Patients with Early                                          | 4  | 20 patients  | PSMA-radioguided surgery for relapse in pelvic lymph nodes            | CellSearch                                                                                | CTC+: more positive lymph nodes, median 8 vs 2.                                                                                                                                 | --                                                                                                                                           |

| Prostate Cancer Recurrence |                                                                                                    |    |                                                                            |                              | Shorter BFS, 1.4 mo vs 4.3 mo, p = 0.018. |    |                                                                                    |
|----------------------------|----------------------------------------------------------------------------------------------------|----|----------------------------------------------------------------------------|------------------------------|-------------------------------------------|----|------------------------------------------------------------------------------------|
| S. Lian et al, 2021 [69]   | Folate-Receptor Positive Circulating umor Cell Is a Potential Diagnostic Marker of Prostate Cancer | 2b | 30 patients + 7 with bladder cancer and 7 with benign conditions (control) | Treatment-naive sporadic PCa | CytoploRare Kit                           | -- | FR+ CTC in malignant vs benign (12.62 ± 1.2 vs. 6.34 ± 0.64, p < 0.001). AUC 0.864 |

Table S3. CTC in PC screening and diagnostics.

| Author, year                     | Title                                                                                                                                                   | No., of patients/samples                                             | Conditions                                                                                                                                                                | Methodology                                                                                                                                       | Cell count                                                                                                                        | Sensitivity                                                                                                                                       | Specificity                                                                                                      |
|----------------------------------|---------------------------------------------------------------------------------------------------------------------------------------------------------|----------------------------------------------------------------------|---------------------------------------------------------------------------------------------------------------------------------------------------------------------------|---------------------------------------------------------------------------------------------------------------------------------------------------|-----------------------------------------------------------------------------------------------------------------------------------|---------------------------------------------------------------------------------------------------------------------------------------------------|------------------------------------------------------------------------------------------------------------------|
| I. Puche-Sanz et al., 2017. [72] | A comprehensive study of circulating tumour cells at the moment of prostate cancer diagnosis: biological and clinical implications of EGFR, AR and SNPs | 86 patients                                                          | Clinical suspicion of PC, based on PSA screening, and meeting criteria for prostate biopsy (PSA>10 ng/ml or PSA between 4 and 10 ng/ml with a free/total PSA <0.2)        | 1) CTCs and genetic analysis. (immunohistochemistry, immunofluorescence)<br>2) A systematic 20-core TRUS-guided biopsy                            | CTC-positive if ≥1 CTCs <sup>CK+</sup> /10 ml<br>Younger age associated with the CTC+ (p=0.03)                                    | 14.2%<br>PPV 31.2%                                                                                                                                | 78.4%<br>NPV 57.4%                                                                                               |
| S. C. Bhakdi, 2019. [71]         | Accuracy of Tumour-Associated Circulating Endothelial Cells as a Screening Biomarker for Clinically Significant Prostate Cancer                         | 146 biopsy-naïve patient, 69 men had PSA in grey zone below 10 ng/mL | Tumour-associated circulating endothelial cells (tCECs) in cases suspicious for PCa; primary definition of csPCa (Gleason 3 + 4) and secondary definition (Gleason 4 + 3) | 1) high-gradient magnetic cell separation (hMX) and cryo-immunostaining for tCECs identification<br>2) A systematic 10-12 core TRUS-guided biopsy | All cases with cell of immunopathological class III (suspicious for malignancy) or higher were considered positive for malignancy | For PSA 4 - 10 and primary definition of csPCa 75% (95% CI 43–95), PPV 32% (16–52); for secondary definition of csPCa 71% (29–96), PPV 18% (6–37) | For PSA 4 – 10 and primary definition of csPCa: 67% (95% CI 53–79), NPV 93% (80-98), 63% (50–75) NPV 95% (83–99) |
| N. P. Murray et al., 2020. [70]  | Platelet-to-lymphocyte ratio and systemic immune-inflammation index versus circulating prostate cells to                                                | 1223 patients                                                        | 114/467 (24.4%) complied with the Epstein criteria for active surveillance. 296 (63.2%) ISUP 1, 145 (31%) were                                                            | 1) Histopaque 1,077 (Sigma-Aldrich): mononuclear cells (circulating prostate cells-CPC) identification.                                           | CPC positive when 1 CPC/8 ml of blood                                                                                             | 0.97 (95%CI 0.94 – 0.98)<br>PPV 65.0%                                                                                                             | 0.79 (95%CI 0.76 – 0.81)<br>NPV 98.0%                                                                            |

|                                                      |                                |                                                       |
|------------------------------------------------------|--------------------------------|-------------------------------------------------------|
| predict significant prostate cancer at first biopsy. | ISUP 2 &3, 27 (5.8%) ISUP 4 &5 | 2) The 1999 ISHAGE for the CTC's expression of P504S. |
|------------------------------------------------------|--------------------------------|-------------------------------------------------------|



**Table S4.** CTC detection: manufacturers and technology.

| Diagnostic system                   | Manufacturer                                        | FDA or EMEA - approved | Blood sample volume     | Blood collection           | Enrichment                                                                     | Characterization & criteria for positivity                                           | Results                                           | Used in                                                                                                                               |
|-------------------------------------|-----------------------------------------------------|------------------------|-------------------------|----------------------------|--------------------------------------------------------------------------------|--------------------------------------------------------------------------------------|---------------------------------------------------|---------------------------------------------------------------------------------------------------------------------------------------|
| AdnaTest                            | QIAGEN, Hilgen, Germany.                            | --                     | 10 mL                   | EDTA tube placed on ice    | Magnetic beads conjugated with EpCAM, HER2 antibodies                          | KLK3, PSMA, EGFR expression                                                          | At least 1 tumor-associated transcript >0.1 ng/ml | [15], [26], [8], [9], [35], [36], [39], [47], [51], [54]                                                                              |
| CanPatrol                           | SurExam, Guangzhou, China                           | --                     | 5 mL                    | EDTA tube                  | Filtration through calibrated membrane with 8- $\mu$ m diameter pores          | Cytomorphology (cell phenotype). Differentiation of epithelial and mesenchymal cells | Absolute number                                   | [59]                                                                                                                                  |
| CellSearch                          | Menarini Silicon Biosystems, Huntington Valley, USA | 2007                   | 7.5 mL                  | CellSave tube              | Anti-EpCAM coated magnetic nanoparticles                                       | IFM: positive if pan-keratin+ & CD45-                                                | Favorable <5, unfavorable 5 cells / 7.5 mL        | [9], [11], [14], [15], [18]–[22], [24], [27]–[30], [36], [40], [42], [44], [45], [47], [48], [57], [58], [60], [62], [63], [85], [49] |
| CellCollector                       | Gilupi GmbH, Postdam, Germany                       | --                     | N/a (in vivo isolation) | Intravenous canule (30min) | Anti-EpCAM adsorbed onto a metallic wire                                       | IFM: positive if pan-keratin+ & CD45-, eventually PSA+                               | Absolute number                                   | [56], [13], [57]                                                                                                                      |
| CELLection Epithelial Enrich system | Invitrogen (Thermo Fisher Scientific), Waltham, USA | --                     | 1 – 40 mL               | CELLection buffer          | Beads coated with EpCAM antibodies                                             | Positive isolation with Biotin Binder Dynabeads                                      | Absolute number                                   | [17]                                                                                                                                  |
| ELISPOT                             | Multiple manufacturers, test based on ELISA         | --                     | 13-15 mL                | EDTA tube                  | Immuno-density cell isolation (RosetteSep <sup>TM</sup> STEMCELL Technologies) | protein fingerprinting: positive if PSA or FGF2 secreting cells on primary culture   | Absolute number                                   | [56]                                                                                                                                  |

|            |                                                   |    |        |                      |                                                                                                      |                                                                                                                                                 |                                                                                        |                                       |
|------------|---------------------------------------------------|----|--------|----------------------|------------------------------------------------------------------------------------------------------|-------------------------------------------------------------------------------------------------------------------------------------------------|----------------------------------------------------------------------------------------|---------------------------------------|
| EPIC       | EpicSciences,<br>San Diego,<br>USA                | -- | 7.5 mL | Streck Tube          | None,<br>test on 3<br>millions<br>nucleated cells                                                    | IF: positive if<br>pan-<br>cytokeratine+ &<br>CD45-<br><br>Also tested for<br>AR-V7 splice<br>variant                                           | AR-V7+ if at<br>least one AR-<br>V7+ CTC per<br>two slides<br>assayed                  | [31], [45], [67], [32], [34],<br>[20] |
| ISET       | Rarecells<br>Diagnostics<br>SAS, Paris,<br>France | -- | 10 mL  | Rarecells®<br>buffer | Antibody-<br>independent<br>isolation by<br>size                                                     | Cytomorphology<br>(cell phenotype)                                                                                                              | The fixed cells<br>on the ISET®<br>membrane (10<br>spots). At<br>least 1 cell/10<br>mL | [82]                                  |
| IsoFlux    | Fluxion<br>Biosciences<br>Inc., Alameda,<br>USA   | -- | 10 mL  | EDTA tube            | Microfluidic<br>cartridges with<br>magnetic beads<br>conjugated<br>with anti-<br>EpCAM<br>antibodies | IFM: positive if<br>pan-keratin+,<br>nucleus+ &<br>CD45-<br><br>Test for EpCAM,<br>EGFR,<br>Mesenchymal,<br>AR-V7                               | Absolute<br>number                                                                     | [23]                                  |
| Parsortix  | ANGLE<br>Biosciences,<br>Toronto,<br>Canada       | -- | 10 mL  | EDTA tube            | Parsortix<br>filtration<br>cassette                                                                  | Filtration based<br>on size and<br>compressibility.<br>Optional<br>staining.                                                                    | Absolute<br>number                                                                     | [43],[52]                             |
| ScreenCell | ScreenCell,<br>Sarcelles,<br>France               | -- | 12 mL  | EDTA tube            | ScreenCell®<br>Cyto filtration                                                                       | CTCs defined as<br>cells in the same<br>plane of focus as<br>filter pores with<br>nucleus at least<br>twice the<br>diameter of a<br>filter pore | Absolute<br>number                                                                     | [50],[52]                             |

|                                  |                                        |    |       |                                      |                                              |                          |                    |      |
|----------------------------------|----------------------------------------|----|-------|--------------------------------------|----------------------------------------------|--------------------------|--------------------|------|
| SMART<br>BIOPSY Cell<br>Isolator | Cytogen Inc.,<br>Seoul, South<br>Korea | -- | 15 mL | Acid citrate<br>dextrose<br>solution | HDM (High<br>density<br>microporous)<br>chip | Size-based<br>filtration | Absolute<br>number | [66] |
|----------------------------------|----------------------------------------|----|-------|--------------------------------------|----------------------------------------------|--------------------------|--------------------|------|
